# Supplementary material for: The Effect of One Night of Sleep on Mnemonic Discrimination of Emotional Information
Source: MDPI journal article supplement (doi:10.3390/brainsci13030434), 2023-03-02
Supplement: s1 [file s1]

## Supplemental Material

**Table S1.** Correlations between self-reported sleep parameters of the night between T1 and T2 and change in study variables in the Sleep group (n=18).

|     |   | $\Delta$ RM<br>Neg | $\Delta$ RM<br>Neu | $\Delta$ RM<br>Pos | $\Delta$ LDI<br>Neg | $\Delta$ LDI<br>Neu | $\Delta$ LDI<br>Pos | $\Delta$ Ar<br>Neg | $\Delta$ Ar<br>Neu | $\Delta$ Ar<br>Pos | $\Delta$ Val<br>Neg | $\Delta$ Val<br>Neu | $\Delta$ Val<br>Pos |
|-----|---|--------------------|--------------------|--------------------|---------------------|---------------------|---------------------|--------------------|--------------------|--------------------|---------------------|---------------------|---------------------|
| BT  | r | -0.039             | -0.110             | -0.334             | 0.324               | -0.174              | 0.060               | -0.317             | -0.117             | -0.066             | 0.115               | -0.019              | 0.184               |
|     | p | 0.874              | 0.654              | 0.163              | 0.176               | 0.476               | 0.806               | 0.187              | 0.635              | 0.789              | 0.639               | 0.938               | 0.452               |
| WT  | r | -0.230             | -0.194             | -0.165             | -0.119              | 0.106               | -0.011              | -0.201             | 0.068              | 0.239              | 0.486               | 0.201               | -0.394              |
|     | p | 0.345              | 0.427              | 0.500              | 0.628               | 0.667               | 0.966               | 0.410              | 0.782              | 0.323              | 0.035               | 0.409               | 0.095               |
| TIB | r | -0.293             | -0.363             | -0.468             | -0.064              | -0.026              | -0.231              | -0.540             | -0.053             | 0.083              | 0.551               | 0.279               | -0.121              |
|     | p | 0.224              | 0.127              | 0.043              | 0.794               | 0.916               | 0.342               | 0.017              | 0.829              | 0.735              | 0.015               | 0.248               | 0.622               |
| TST | r | -0.170             | -0.072             | -0.535             | -0.071              | -0.095              | -0.417              | -0.451             | 0.234              | 0.090              | 0.429               | 0.124               | -0.003              |
|     | p | 0.485              | 0.769              | 0.018              | 0.774               | 0.700               | 0.076               | 0.053              | 0.335              | 0.715              | 0.067               | 0.612               | 0.992               |
| SE  | r | 0.192              | 0.461              | -0.142             | 0.008               | -0.125              | -0.322              | 0.087              | 0.440              | 0.031              | -0.150              | -0.181              | 0.177               |
|     | P | 0.430              | 0.047              | 0.562              | 0.973               | 0.609               | 0.178               | 0.724              | 0.059              | 0.898              | 0.541               | 0.459               | 0.469               |

**Notes.** BT: Bedtime; WT: Waketime; TIB: Time in Bed; TST: Total Sleep Time; SE: Sleep Efficiency; RM: Recognition Memory; LDI: Lure Discrimination Index; Ar: Arousal; Val: Valence; Neg: Negative; Neu: Neutral; Pos: Positive. R: Pearson's r. p: uncorrected p-value. Using Bonferroni correction, the significant level is set to  $p < 0.00083$ .

**Table S2.** Correlations between self-reported sleep parameters of the night before T1 and change in study variables in the Wake group (n=18).

|     |   | $\Delta$ RM<br>Neg | $\Delta$ RM<br>Neu | $\Delta$ RM<br>Pos | $\Delta$ LDI<br>Neg | $\Delta$ LDI<br>Neu | $\Delta$ LDI<br>Pos | $\Delta$ Ar<br>Neg | $\Delta$ Ar<br>Neu | $\Delta$ Ar<br>Pos | $\Delta$ Val<br>Neg | $\Delta$ Val<br>Neu | $\Delta$ Val<br>Pos |
|-----|---|--------------------|--------------------|--------------------|---------------------|---------------------|---------------------|--------------------|--------------------|--------------------|---------------------|---------------------|---------------------|
| BT  | p | 0.196              | 0.372              | -0.193             | 0.036               | -0.184              | 0.088               | 0.249              | 0.371              | -0.022             | 0.033               | -0.269              | -0.174              |
|     | r | 0.422              | 0.117              | 0.428              | 0.884               | 0.451               | 0.721               | 0.303              | 0.118              | 0.928              | 0.894               | 0.265               | 0.477               |
| WT  | p | 0.613              | -0.220             | 0.248              | -0.361              | -0.363              | 0.229               | -0.346             | -0.134             | -0.169             | 0.343               | 0.126               | -0.327              |
|     | r | 0.005              | 0.366              | 0.307              | 0.129               | 0.127               | 0.345               | 0.147              | 0.585              | 0.490              | 0.151               | 0.606               | 0.171               |
| TIB | p | 0.318              | 0.087              | -0.225             | -0.122              | -0.373              | -0.016              | 0.208              | 0.091              | -0.409             | 0.129               | -0.179              | -0.208              |
|     | r | 0.185              | 0.724              | 0.354              | 0.619               | 0.115               | 0.947               | 0.393              | 0.712              | 0.082              | 0.599               | 0.465               | 0.393               |
| TST | p | 0.429              | -0.055             | -0.106             | -0.036              | -0.297              | 0.123               | 0.144              | 0.122              | -0.271             | 0.297               | -0.008              | -0.193              |
|     | r | 0.067              | 0.823              | 0.667              | 0.885               | 0.216               | 0.617               | 0.556              | 0.620              | 0.261              | 0.216               | 0.974               | 0.429               |
| SE  | P | 0.178              | -0.280             | 0.348              | 0.189               | 0.188               | 0.372               | -0.266             | 0.043              | 0.412              | 0.309               | 0.379               | 0.109               |
|     | r | 0.465              | 0.245              | 0.145              | 0.439               | 0.440               | 0.117               | 0.271              | 0.861              | 0.080              | 0.198               | 0.109               | 0.657               |

**Notes.** BT: Bedtime; WT: Waketime; TIB: Time in Bed; TST: Total Sleep Time; SE: Sleep Efficiency; RM: Recognition Memory; LDI: Lure Discrimination Index; Ar: Arousal; Val: Valence; Neg: Negative; Neu: Neutral; Pos: Positive. R: Pearson's r. p: uncorrected p-value. Using Bonferroni correction, the significant level is set to  $p < 0.00083$ .
